# Supplementary material for: Catalytic oxidant scavenging by selenium-containing compounds: Reduction of selenoxides and N-chloramines by thiols and redox enzymes
Source: PubMed Central journal article supplement — Redox Biol. 2017 Apr 19;12:872–82. doi: 10.1016/j.redox.2017.04.023 (PMC5408155; doi:10.1016/j.redox.2017.04.023), 2017-04-19
Supplement: mmc1.pdf [file mmc1.pdf]

## **SUPPLEMENTARY DATA**

### **Catalytic oxidant scavenging by selenium-containing compounds: reduction of selenoxides and *N*-chloramines by thiols and redox enzymes**

Luke Carroll<sup>1,2,3</sup>, David I. Pattison<sup>1,2</sup>, Shanlin Fu<sup>4</sup>, Carl H. Schiesser<sup>5</sup>, Michael J. Davies<sup>1,2,3</sup> and Clare L. Hawkins<sup>1,2,3\*</sup>

<sup>1</sup>The Heart Research Institute, 7 Eliza St, Newtown, NSW 2042, Australia; <sup>2</sup>Sydney Medical School, University of Sydney, Sydney, NSW 2006, Australia; <sup>3</sup>Department of Biomedical Sciences, Panum Institute, University of Copenhagen, Blegdamsvej 3, Copenhagen 2200, Denmark; <sup>4</sup>University of Technology Sydney, Centre for Forensic Science, Ultimo NSW 2007, Australia; <sup>5</sup>School of Chemistry and Bio21 Molecular Science and Biotechnology Institute, University of Melbourne, Victoria 3010, Australia.

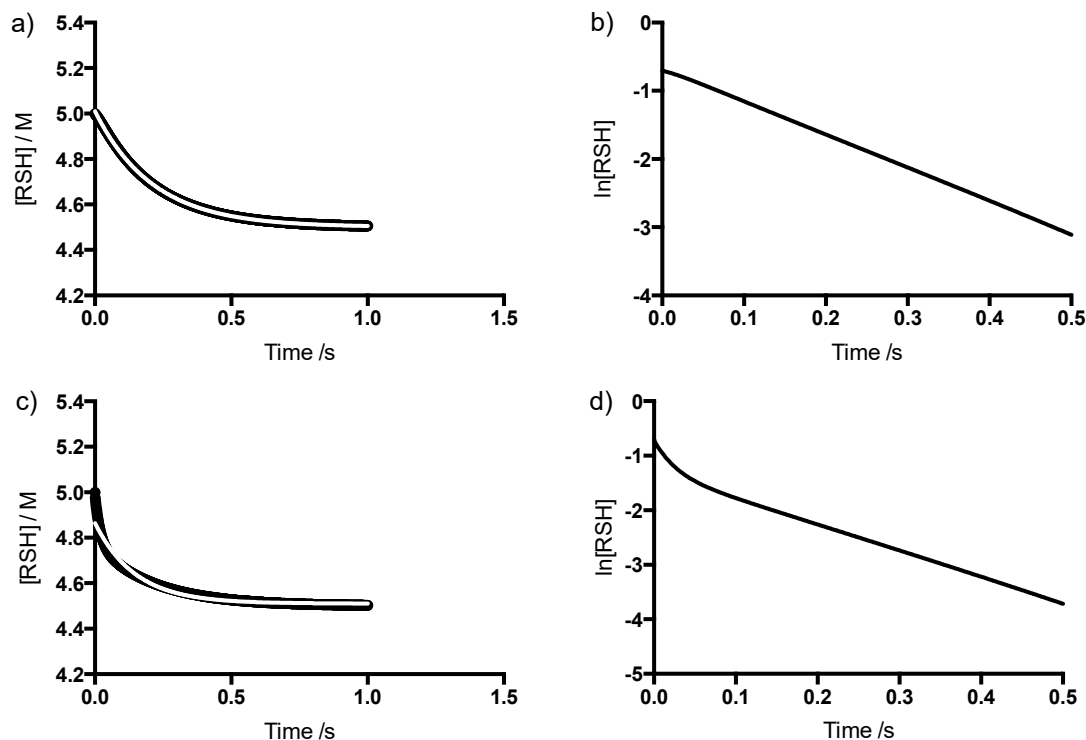

*Figure S.1 – Computational models showing reaction profile for the proposed two-step mechanism shown in Scheme 1*

Graph a) shows computational model (black line) of the reaction ( $A + \text{RSH} \rightarrow C + \text{RSH} \rightarrow D + E + F$ ) where concentration of RSH is set to 5 M, representing a ten-fold excess of the concentration of A, set to 0.5 M. The rate constant for the  $k_2$  was set to 10 and  $k_1$  was set to 1. The simulation was run for 1000 points, with the theoretical concentrations of A and RSH calculated at 0.001 s intervals. An exponential decay function was fitted to the data obtained for concentrations of RSH (white line). Graph c) shows the same model (black line), with  $k_2$  set to 1 and  $k_1$  set to 10, with the exponential fit (white line). The concentration of RSH obtained in a) was plotted as  $\ln[\text{RSH}]$  vs time in b). The concentration of RSH obtained in c) was plotted as  $\ln[\text{RSH}]$  vs time in d). When  $k_2 > k_1$  first-order conditions are observed, with concentration data fitting to single exponential curve, and  $\ln[\text{RSH}]$  vs time plots linear. When  $k_2 < k_1$ , first-order mechanisms are not observed. Computational models were performed in Mechanism-Based Kinetics Simulator available at (<http://www.stolaf.edu/depts/chemistry/courses/toolkits/126/js/kinetics/>). Exponential fits were performed in Prism v6.

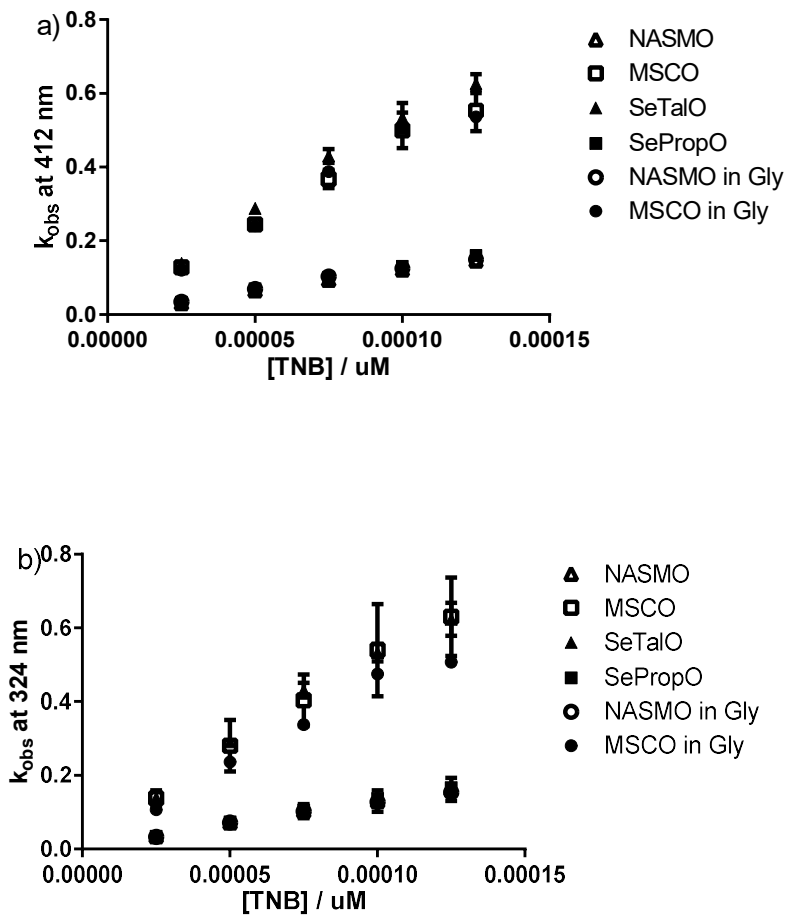

*Figure S.2 – Pseudo first-order plot for the reduction of selenoxides (5  $\mu M$ ) by increasing TNB (25 – 125  $\mu M$ )*

The observed rate constant,  $k_{obs}$ , was determined at (a) 412 nm (consumption of TNB) or (b) 324 nm (formation of DTNB), from kinetic data obtained after mixing preformed selenoxides (5  $\mu M$ ) with TNB (25 – 125  $\mu M$ ) using single exponential fitting.  $k_{obs}$  was plotted against initial TNB concentration and the second-order rate constants determined from the gradient of these plots and are reported in Table 1. Data represent mean  $\pm$  SD of three independent experiments.

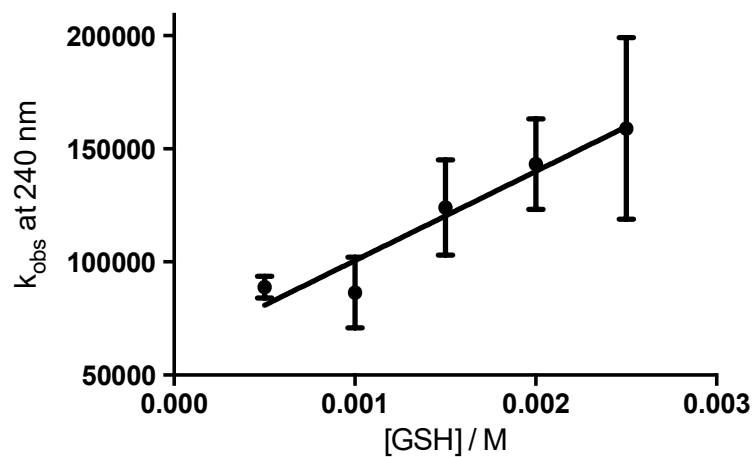

*Figure S.3 – Pseudo first-order plot for the initial phase measured during reduction of SeMetO with increasing [GSH]*

The observed rate constant,  $k_{obs}$ , was determined at 240 nm from kinetic data obtained after mixing SeMetO (125  $\mu$ M) with GSH (0.5 – 2.5 mM) using single exponential fitting.  $k_{obs}$  was plotted against the initial GSH concentration and the second-order rate constant determined from the gradient of this plot. Data represent mean  $\pm$  SD of three independent experiments.

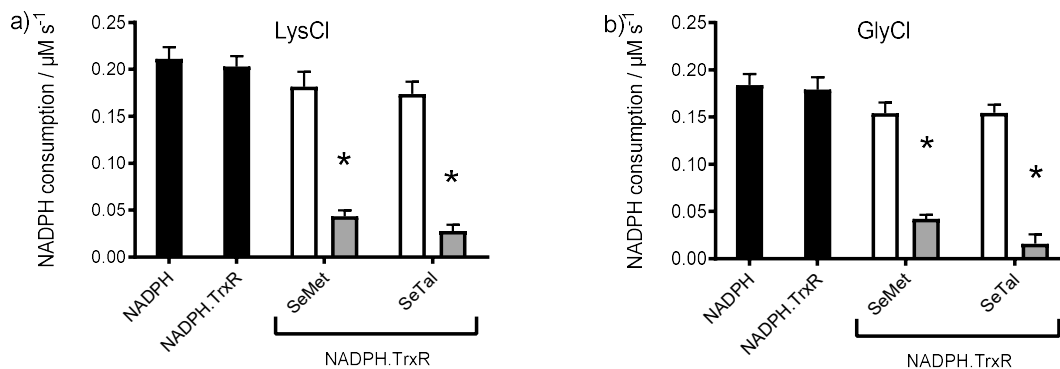

**Figure S.4 – Rate of absorbance change at 340 nm after addition of LysCl and GlyCl to the TrxR system in the presence or absence of SeMet and SeTal**

The initial rate of change in absorbance at 340 nm was determined over the first 15 min after (a) LysCl (200  $\mu\text{M}$ ) or (b) GlyCl (200  $\mu\text{M}$ ) was added to the TrxR (25 nM) and NADPH (700  $\mu\text{M}$ ) in the presence or absence of SeMet (20  $\mu\text{M}$  – white bars; 200  $\mu\text{M}$  grey bars) and SeTal (20  $\mu\text{M}$  – white bars; 200  $\mu\text{M}$  grey bars). Data represent mean  $\pm$  SD of three independent experiments. \* indicates significant difference ( $p < 0.05$ ) from the control with no selenium compound by one-way ANOVA with Tukey's post-hoc test.

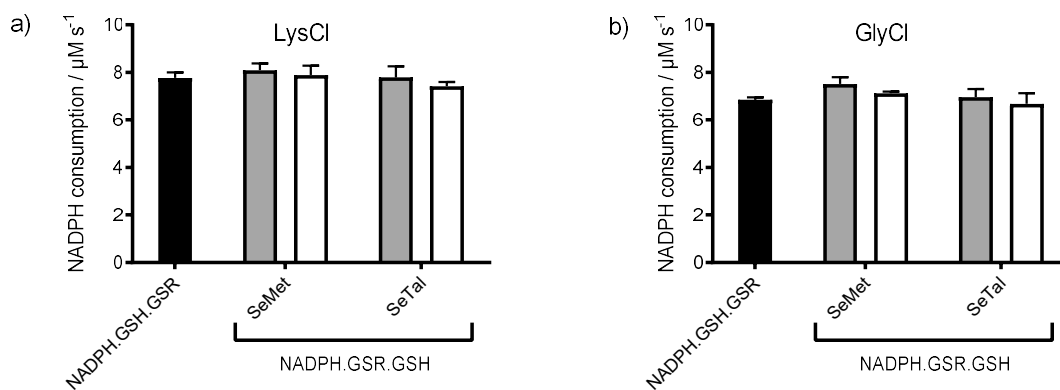

**Figure S.5 – Rate of absorbance change at 340 nm after addition of LysCl and GlyCl to the GSR system in the presence or absence of SeMet and SeTal**

The initial rate of change in absorbance at 340 nm was determined over the first 10 s after (a) LysCl (200  $\mu\text{M}$ ) or (b) GlyCl (200  $\mu\text{M}$ ) was added to the GSR (25 nM), GSH (400  $\mu\text{M}$ ) and NADPH (500  $\mu\text{M}$ ) in the presence or absence of SeMet (20  $\mu\text{M}$  – white bars; 200  $\mu\text{M}$  grey bars) and SeTal (20  $\mu\text{M}$  – white bars; 200  $\mu\text{M}$  grey bars). Data represent mean  $\pm$  SD of three independent experiments.
